# Supplementary material for: A comprehensive hybridization model allows whole HERV transcriptome profiling using high density microarray
Source: PubMed Central journal article supplement (PMC5385096; doi:10.1186/s12864-017-3669-7), 2017-04-08
Supplement: 12864_2017_3669_MOESM6_ESM.pdf [file 12864_2017_3669_MOESM6_ESM.pdf]

**RT-PCR validation of HERV loci that are specific of placenta, colon and prostate tumor tissues, and, embryonic stem cells.**

RT-PCRs were performed on 5 tissues and cell lines (placenta, prostate, colon, OSCAR and EBJ14) as follow. Total RNA (200 ng) was DNase-treated and reverse transcribed (QuantiTec Reverse Transcription Kit, Qiagen) in 20 µL reaction volume. SYBR green experiments were set up using the Type-it HRM PCR kit in 20 µL final reaction volume with 0.3 µM primers and 9 µL of 20-fold cDNA dilution. The cDNA amplification were performed as follows: a 5 min denaturation step at 95°C followed by 40 cycles (95°C for 10s, Tm for 30s, 72°C for 10s) and melting curve analysis. TaqMan experiments were performed in a volume of 20 µL containing 1 µL TaqMan® Gene Expression Assay 20X, 10 µL TaqMan® 2X Universal PCR Master Mix, No Amperase® UNG (Applied Biosystems) and 9 µL of 20-fold diluted cDNA. Thermal cycling conditions were: 10 min at 95 C, followed by 40 cycles of amplification with 15 s at 95 C and 1 min at 60 C. All reactions were performed in duplicates. Expression of housekeeping genes G6PD, RPLPO and GAPDH was monitored for normalization. Relative Expression (RE) values were defined as  $Eff\Delta Ct$ , in which  $\Delta Ct = Ct_{min-series} - Ct_{sample}$ . Loci of interest values were normalized by using the geometric mean of RE values corresponding to G6PD, RPLPO and GAPDH. Within a sample series, the lowest normalized RE value was finally arbitrary set at one and other values scaled up in order to provide a final relative differential expression view. Graphical representations were generated using GraphPad Prism 5.0.

**PCR Primer Sequences**

| Locus                                               | Forward primer                                   | Reverse primer            |
|-----------------------------------------------------|--------------------------------------------------|---------------------------|
| HERV-W / <b>0712819</b><br>(Syncytin1 / ERVWE1)     | TaqMan assay HS02341206_g1 (Applied Biosystems)  |                           |
| HERV-FRD / <b>0601661</b><br>(Syncytin2 / ERVFRDE1) | TaqMan assay HS01652148_m1* (Applied Biosystems) |                           |
| HERV-H / <b>0X00906</b>                             | CAGGCGTTGCTGAGTGTGTCTAATC                        | TGGAGCCTGAGGAAGAATTGGGACC |
| HERV-H / <b>2003992</b>                             | CCCAAGCGGCGCTGAGTCTT                             | TGGGATGAAGGGAGGGGAGGC     |
| HML-2 / <b>2200706</b>                              | TTCCACCTGAGGAGAAATGC                             | GACCACACTCGAGAGTCCCT      |
| HERV-H / <b>0430884</b>                             | AGTGAGTTGTGGAGGAGGGTAT                           | TCGCCTGCTACAAAATTGCC      |
| HERV-H / <b>0308707</b>                             | GAAACGTCTGGCTGCTACAGT                            | TCACCTTCAAGGTGTGAAATAACAG |
| HERV-H / <b>0400516</b>                             | ACCTCCCCACTGAGTACAT                              | GGGGCCGTTTTATAGGATTTCCG   |
| <b>081709501-MALR1007uL_at</b>                      | TATTATGTCAAATCTTTCATGCAC                         | TCATACAGGCCCTTTAAATCT     |

**HERV-W (Syncytin-1) and HERV-FRD (Syncytin-2) loci expressed only in the placenta tissue.**

| Family / locus name (this work). Chromosomal localization                     | Expression detected using HERV-V3 and previous generation microarrays |                                                          | RT-PCR validation                                                                                                                                                                                                                                                                                                                                                                                                                                          |        |                             |         |    |         |    |            |    |            |    |          |       |
|-------------------------------------------------------------------------------|-----------------------------------------------------------------------|----------------------------------------------------------|------------------------------------------------------------------------------------------------------------------------------------------------------------------------------------------------------------------------------------------------------------------------------------------------------------------------------------------------------------------------------------------------------------------------------------------------------------|--------|-----------------------------|---------|----|---------|----|------------|----|------------|----|----------|-------|
|                                                                               | Arrays                                                                | Probesets                                                |                                                                                                                                                                                                                                                                                                                                                                                                                                                            |        |                             |         |    |         |    |            |    |            |    |          |       |
| HERV-W / <b>0712819</b><br>chr7:92467962-92478192<br>(Syncytin1 / ERVWE1)     | HERV-V3                                                               | 071281911ERVW5LR<br>071281907ERVWgag<br>071281905ERVWpol | <p><b>HERV-W_0712819</b></p> <table border="1"> <caption>RT-PCR normalized expression values for HERV-W_0712819</caption> <thead> <tr> <th>Tissue</th> <th>Normalized Expression Value</th> </tr> </thead> <tbody> <tr> <td>Colon N</td> <td>~0</td> </tr> <tr> <td>Colon T</td> <td>~0</td> </tr> <tr> <td>Prostate N</td> <td>~0</td> </tr> <tr> <td>Prostate T</td> <td>~0</td> </tr> <tr> <td>Placenta</td> <td>~350</td> </tr> </tbody> </table>      | Tissue | Normalized Expression Value | Colon N | ~0 | Colon T | ~0 | Prostate N | ~0 | Prostate T | ~0 | Placenta | ~350  |
|                                                                               | Tissue                                                                | Normalized Expression Value                              |                                                                                                                                                                                                                                                                                                                                                                                                                                                            |        |                             |         |    |         |    |            |    |            |    |          |       |
|                                                                               | Colon N                                                               | ~0                                                       |                                                                                                                                                                                                                                                                                                                                                                                                                                                            |        |                             |         |    |         |    |            |    |            |    |          |       |
| Colon T                                                                       | ~0                                                                    |                                                          |                                                                                                                                                                                                                                                                                                                                                                                                                                                            |        |                             |         |    |         |    |            |    |            |    |          |       |
| Prostate N                                                                    | ~0                                                                    |                                                          |                                                                                                                                                                                                                                                                                                                                                                                                                                                            |        |                             |         |    |         |    |            |    |            |    |          |       |
| Prostate T                                                                    | ~0                                                                    |                                                          |                                                                                                                                                                                                                                                                                                                                                                                                                                                            |        |                             |         |    |         |    |            |    |            |    |          |       |
| Placenta                                                                      | ~350                                                                  |                                                          |                                                                                                                                                                                                                                                                                                                                                                                                                                                            |        |                             |         |    |         |    |            |    |            |    |          |       |
| HERV-V2                                                                       | 700341_w_L5R<br>700341_w_gag<br>700341_w_pol                          |                                                          |                                                                                                                                                                                                                                                                                                                                                                                                                                                            |        |                             |         |    |         |    |            |    |            |    |          |       |
| HERV-V1                                                                       | HW28073.L5.U5<br>envw_at<br>sp.ervwe1_at                              |                                                          |                                                                                                                                                                                                                                                                                                                                                                                                                                                            |        |                             |         |    |         |    |            |    |            |    |          |       |
| HERV-FRD / <b>0601661</b><br>chr6:11102749-11112216<br>(Syncytin2 / ERVFRDE1) | HERV-V3                                                               | 060166103HFRDenv<br>060166102HFRD3LU3                    | <p><b>HERV-FRD_0601661</b></p> <table border="1"> <caption>RT-PCR normalized expression values for HERV-FRD_0601661</caption> <thead> <tr> <th>Tissue</th> <th>Normalized Expression Value</th> </tr> </thead> <tbody> <tr> <td>Colon N</td> <td>~0</td> </tr> <tr> <td>Colon T</td> <td>~0</td> </tr> <tr> <td>Prostate N</td> <td>~0</td> </tr> <tr> <td>Prostate T</td> <td>~0</td> </tr> <tr> <td>Placenta</td> <td>~1000</td> </tr> </tbody> </table> | Tissue | Normalized Expression Value | Colon N | ~0 | Colon T | ~0 | Prostate N | ~0 | Prostate T | ~0 | Placenta | ~1000 |
|                                                                               | Tissue                                                                | Normalized Expression Value                              |                                                                                                                                                                                                                                                                                                                                                                                                                                                            |        |                             |         |    |         |    |            |    |            |    |          |       |
|                                                                               | Colon N                                                               | ~0                                                       |                                                                                                                                                                                                                                                                                                                                                                                                                                                            |        |                             |         |    |         |    |            |    |            |    |          |       |
| Colon T                                                                       | ~0                                                                    |                                                          |                                                                                                                                                                                                                                                                                                                                                                                                                                                            |        |                             |         |    |         |    |            |    |            |    |          |       |
| Prostate N                                                                    | ~0                                                                    |                                                          |                                                                                                                                                                                                                                                                                                                                                                                                                                                            |        |                             |         |    |         |    |            |    |            |    |          |       |
| Prostate T                                                                    | ~0                                                                    |                                                          |                                                                                                                                                                                                                                                                                                                                                                                                                                                            |        |                             |         |    |         |    |            |    |            |    |          |       |
| Placenta                                                                      | ~1000                                                                 |                                                          |                                                                                                                                                                                                                                                                                                                                                                                                                                                            |        |                             |         |    |         |    |            |    |            |    |          |       |
| HERV-V2                                                                       | 600084_f_env<br>600084_f_L3U3                                         |                                                          |                                                                                                                                                                                                                                                                                                                                                                                                                                                            |        |                             |         |    |         |    |            |    |            |    |          |       |
| HERV-V1                                                                       | envfrd_at                                                             |                                                          |                                                                                                                                                                                                                                                                                                                                                                                                                                                            |        |                             |         |    |         |    |            |    |            |    |          |       |

**HERV-H and HML-2 loci expressed specifically in colon or prostate cancer tissues.**

| Family / locus name (this work). Chromosomal localization | Expression detected using HERV-V3 and previous generation microarrays |                                                                                                   | RT-PCR validation                                                                                                                                                                                                                                                                                                                                                                                                                                |        |                             |         |    |         |      |            |    |            |        |          |    |
|-----------------------------------------------------------|-----------------------------------------------------------------------|---------------------------------------------------------------------------------------------------|--------------------------------------------------------------------------------------------------------------------------------------------------------------------------------------------------------------------------------------------------------------------------------------------------------------------------------------------------------------------------------------------------------------------------------------------------|--------|-----------------------------|---------|----|---------|------|------------|----|------------|--------|----------|----|
|                                                           | Arrays                                                                | Probesets                                                                                         |                                                                                                                                                                                                                                                                                                                                                                                                                                                  |        |                             |         |    |         |      |            |    |            |        |          |    |
| HERV-H / <b>OX00906</b><br>chrX:4540474-4546320           | HERV-V3                                                               | OX0090605ERVHgag<br>OX0090606ERVHpol                                                              | <p><b>HERV-H_OX00906</b></p> <table border="1"> <caption>HERV-H_OX00906 RT-PCR normalized expression values</caption> <thead> <tr> <th>Tissue</th> <th>Normalized Expression Value</th> </tr> </thead> <tbody> <tr> <td>Colon N</td> <td>0</td> </tr> <tr> <td>Colon T</td> <td>~380</td> </tr> <tr> <td>Prostate N</td> <td>0</td> </tr> <tr> <td>Prostate T</td> <td>0</td> </tr> <tr> <td>Placenta</td> <td>0</td> </tr> </tbody> </table>    | Tissue | Normalized Expression Value | Colon N | 0  | Colon T | ~380 | Prostate N | 0  | Prostate T | 0      | Placenta | 0  |
|                                                           | Tissue                                                                | Normalized Expression Value                                                                       |                                                                                                                                                                                                                                                                                                                                                                                                                                                  |        |                             |         |    |         |      |            |    |            |        |          |    |
| Colon N                                                   | 0                                                                     |                                                                                                   |                                                                                                                                                                                                                                                                                                                                                                                                                                                  |        |                             |         |    |         |      |            |    |            |        |          |    |
| Colon T                                                   | ~380                                                                  |                                                                                                   |                                                                                                                                                                                                                                                                                                                                                                                                                                                  |        |                             |         |    |         |      |            |    |            |        |          |    |
| Prostate N                                                | 0                                                                     |                                                                                                   |                                                                                                                                                                                                                                                                                                                                                                                                                                                  |        |                             |         |    |         |      |            |    |            |        |          |    |
| Prostate T                                                | 0                                                                     |                                                                                                   |                                                                                                                                                                                                                                                                                                                                                                                                                                                  |        |                             |         |    |         |      |            |    |            |        |          |    |
| Placenta                                                  | 0                                                                     |                                                                                                   |                                                                                                                                                                                                                                                                                                                                                                                                                                                  |        |                             |         |    |         |      |            |    |            |        |          |    |
| HERV-V2                                                   | X00041_h_gag<br>X00041_h_pol                                          |                                                                                                   |                                                                                                                                                                                                                                                                                                                                                                                                                                                  |        |                             |         |    |         |      |            |    |            |        |          |    |
| HERV-H / <b>2003992</b><br>chr20:19752047-19756776        | HERV-V3                                                               | 200399205ERVHgag<br>200399206ERVHpol                                                              | <p><b>HERV-H_2003992</b></p> <table border="1"> <caption>HERV-H_2003992 RT-PCR normalized expression values</caption> <thead> <tr> <th>Tissue</th> <th>Normalized Expression Value</th> </tr> </thead> <tbody> <tr> <td>Colon N</td> <td>~2</td> </tr> <tr> <td>Colon T</td> <td>~50</td> </tr> <tr> <td>Prostate N</td> <td>~2</td> </tr> <tr> <td>Prostate T</td> <td>~1</td> </tr> <tr> <td>Placenta</td> <td>~1</td> </tr> </tbody> </table> | Tissue | Normalized Expression Value | Colon N | ~2 | Colon T | ~50  | Prostate N | ~2 | Prostate T | ~1     | Placenta | ~1 |
|                                                           | Tissue                                                                | Normalized Expression Value                                                                       |                                                                                                                                                                                                                                                                                                                                                                                                                                                  |        |                             |         |    |         |      |            |    |            |        |          |    |
| Colon N                                                   | ~2                                                                    |                                                                                                   |                                                                                                                                                                                                                                                                                                                                                                                                                                                  |        |                             |         |    |         |      |            |    |            |        |          |    |
| Colon T                                                   | ~50                                                                   |                                                                                                   |                                                                                                                                                                                                                                                                                                                                                                                                                                                  |        |                             |         |    |         |      |            |    |            |        |          |    |
| Prostate N                                                | ~2                                                                    |                                                                                                   |                                                                                                                                                                                                                                                                                                                                                                                                                                                  |        |                             |         |    |         |      |            |    |            |        |          |    |
| Prostate T                                                | ~1                                                                    |                                                                                                   |                                                                                                                                                                                                                                                                                                                                                                                                                                                  |        |                             |         |    |         |      |            |    |            |        |          |    |
| Placenta                                                  | ~1                                                                    |                                                                                                   |                                                                                                                                                                                                                                                                                                                                                                                                                                                  |        |                             |         |    |         |      |            |    |            |        |          |    |
| HERV-V2                                                   | 2000045_h_gag<br>2000045_h_pol                                        |                                                                                                   |                                                                                                                                                                                                                                                                                                                                                                                                                                                  |        |                             |         |    |         |      |            |    |            |        |          |    |
| HML-2 / <b>2200706</b><br>chr22:23537740-23546008         | HERV-V3                                                               | 220070602HK025LR<br>220070603HK025LU5<br>220070604HK02gag<br>220070608HK02pol<br>220070609HK02env | <p><b>HML-2_2200706</b></p> <table border="1"> <caption>HML-2_2200706 RT-PCR normalized expression values</caption> <thead> <tr> <th>Tissue</th> <th>Normalized Expression Value</th> </tr> </thead> <tbody> <tr> <td>Colon N</td> <td>0</td> </tr> <tr> <td>Colon T</td> <td>0</td> </tr> <tr> <td>Prostate N</td> <td>0</td> </tr> <tr> <td>Prostate T</td> <td>~14000</td> </tr> <tr> <td>Placenta</td> <td>0</td> </tr> </tbody> </table>    | Tissue | Normalized Expression Value | Colon N | 0  | Colon T | 0    | Prostate N | 0  | Prostate T | ~14000 | Placenta | 0  |
|                                                           | Tissue                                                                | Normalized Expression Value                                                                       |                                                                                                                                                                                                                                                                                                                                                                                                                                                  |        |                             |         |    |         |      |            |    |            |        |          |    |
| Colon N                                                   | 0                                                                     |                                                                                                   |                                                                                                                                                                                                                                                                                                                                                                                                                                                  |        |                             |         |    |         |      |            |    |            |        |          |    |
| Colon T                                                   | 0                                                                     |                                                                                                   |                                                                                                                                                                                                                                                                                                                                                                                                                                                  |        |                             |         |    |         |      |            |    |            |        |          |    |
| Prostate N                                                | 0                                                                     |                                                                                                   |                                                                                                                                                                                                                                                                                                                                                                                                                                                  |        |                             |         |    |         |      |            |    |            |        |          |    |
| Prostate T                                                | ~14000                                                                |                                                                                                   |                                                                                                                                                                                                                                                                                                                                                                                                                                                  |        |                             |         |    |         |      |            |    |            |        |          |    |
| Placenta                                                  | 0                                                                     |                                                                                                   |                                                                                                                                                                                                                                                                                                                                                                                                                                                  |        |                             |         |    |         |      |            |    |            |        |          |    |
| HERV-V2                                                   | 2200033_2_L5R<br>2200033_2_L5U5<br>2200033_2_gag<br>2200033_2_env     |                                                                                                   |                                                                                                                                                                                                                                                                                                                                                                                                                                                  |        |                             |         |    |         |      |            |    |            |        |          |    |

**HERV-H and MalR loci specifically expressed in human embryonic stem cells.**

| Family / locus name (this work). Chromosomal localization | Expression detected using HERV-V3 and previous generation microarrays |                             | RT-PCR validation                                                                                                                                                                                                                                                                                                                        |           |                             |       |    |       |      |
|-----------------------------------------------------------|-----------------------------------------------------------------------|-----------------------------|------------------------------------------------------------------------------------------------------------------------------------------------------------------------------------------------------------------------------------------------------------------------------------------------------------------------------------------|-----------|-----------------------------|-------|----|-------|------|
|                                                           | Arrays                                                                | Probesets                   |                                                                                                                                                                                                                                                                                                                                          |           |                             |       |    |       |      |
| HERV-H / <b>0430884</b><br>chr4:179166474-179170568       | HERV-V3                                                               | 043088405ERVHpol_at         | <p align="center"><b>HERV-H_0430884</b></p> <table border="1"> <caption>RT-PCR normalized expression values for HERV-H_0430884</caption> <thead> <tr> <th>Cell Line</th> <th>Normalized Expression Value</th> </tr> </thead> <tbody> <tr> <td>EBJ14</td> <td>~0</td> </tr> <tr> <td>OSCAR</td> <td>~115</td> </tr> </tbody> </table>     | Cell Line | Normalized Expression Value | EBJ14 | ~0 | OSCAR | ~115 |
|                                                           | Cell Line                                                             | Normalized Expression Value |                                                                                                                                                                                                                                                                                                                                          |           |                             |       |    |       |      |
| EBJ14                                                     | ~0                                                                    |                             |                                                                                                                                                                                                                                                                                                                                          |           |                             |       |    |       |      |
| OSCAR                                                     | ~115                                                                  |                             |                                                                                                                                                                                                                                                                                                                                          |           |                             |       |    |       |      |
| HERV-V2                                                   | 400831_h_gag_at                                                       |                             |                                                                                                                                                                                                                                                                                                                                          |           |                             |       |    |       |      |
| HERV-H / <b>0308707</b><br>chr3:54634482-54640204         | HERV-V3                                                               | 030870706ERVHgag_at         | <p align="center"><b>HERV-H_0308707</b></p> <table border="1"> <caption>RT-PCR normalized expression values for HERV-H_0308707</caption> <thead> <tr> <th>Cell Line</th> <th>Normalized Expression Value</th> </tr> </thead> <tbody> <tr> <td>EBJ14</td> <td>~0</td> </tr> <tr> <td>OSCAR</td> <td>~280</td> </tr> </tbody> </table>     | Cell Line | Normalized Expression Value | EBJ14 | ~0 | OSCAR | ~280 |
|                                                           | Cell Line                                                             | Normalized Expression Value |                                                                                                                                                                                                                                                                                                                                          |           |                             |       |    |       |      |
| EBJ14                                                     | ~0                                                                    |                             |                                                                                                                                                                                                                                                                                                                                          |           |                             |       |    |       |      |
| OSCAR                                                     | ~280                                                                  |                             |                                                                                                                                                                                                                                                                                                                                          |           |                             |       |    |       |      |
| HERV-V3                                                   | 040051607ERVH3LU3l_at                                                 |                             |                                                                                                                                                                                                                                                                                                                                          |           |                             |       |    |       |      |
| HERV-H / <b>0400516</b><br>chr4:3927446-3933082           | HERV-V3                                                               | 040051607ERVH3LU3l_at       | <p align="center"><b>HERV-H_0400516</b></p> <table border="1"> <caption>RT-PCR normalized expression values for HERV-H_0400516</caption> <thead> <tr> <th>Cell Line</th> <th>Normalized Expression Value</th> </tr> </thead> <tbody> <tr> <td>EBJ14</td> <td>~1</td> </tr> <tr> <td>OSCAR</td> <td>~9</td> </tr> </tbody> </table>       | Cell Line | Normalized Expression Value | EBJ14 | ~1 | OSCAR | ~9   |
|                                                           | Cell Line                                                             | Normalized Expression Value |                                                                                                                                                                                                                                                                                                                                          |           |                             |       |    |       |      |
| EBJ14                                                     | ~1                                                                    |                             |                                                                                                                                                                                                                                                                                                                                          |           |                             |       |    |       |      |
| OSCAR                                                     | ~9                                                                    |                             |                                                                                                                                                                                                                                                                                                                                          |           |                             |       |    |       |      |
| HERV-V3                                                   | 081709501-MALR1007uL_at                                               |                             |                                                                                                                                                                                                                                                                                                                                          |           |                             |       |    |       |      |
| MALR1007 / <b>0817095</b><br>chr8:114297028-114297284     | HERV-V3                                                               | 081709501-MALR1007uL_at     | <p align="center"><b>MALR1007_0817095</b></p> <table border="1"> <caption>RT-PCR normalized expression values for MALR1007_0817095</caption> <thead> <tr> <th>Cell Line</th> <th>Normalized Expression Value</th> </tr> </thead> <tbody> <tr> <td>EBJ14</td> <td>~0</td> </tr> <tr> <td>OSCAR</td> <td>~125</td> </tr> </tbody> </table> | Cell Line | Normalized Expression Value | EBJ14 | ~0 | OSCAR | ~125 |
|                                                           | Cell Line                                                             | Normalized Expression Value |                                                                                                                                                                                                                                                                                                                                          |           |                             |       |    |       |      |
| EBJ14                                                     | ~0                                                                    |                             |                                                                                                                                                                                                                                                                                                                                          |           |                             |       |    |       |      |
| OSCAR                                                     | ~125                                                                  |                             |                                                                                                                                                                                                                                                                                                                                          |           |                             |       |    |       |      |
| HERV-V3                                                   | 081709501-MALR1007uL_at                                               |                             |                                                                                                                                                                                                                                                                                                                                          |           |                             |       |    |       |      |
